# Supplementary material
Source: publisher site journal article supplement (https://www.dovepress.com/article/596123)
Supplement: Supplementary file 1 [file 596123%20Supplementary%20Material.docx]

SUPPLEMENTARY ONLINE MATERIAL 1
FOR

Cost-Effectiveness of Differential Target Multiplexed Spinal Cord Stimulation
from the Belgian-Payer Perspective

Table of Contents

[1 Table of Contents 1](#_Toc227850332)

[1. Supplementary Model Inputs 1 2](#_Toc227850333)

[1.1 Patient demographics 2](#_Toc227850334)

[1.2 Short-term efficacy 2](#_Toc227850335)

*Table S1. Efficacy probabilities used in model, decision tree phase*

[1.3 Long-term efficacy 3](#_Toc227850336)

[1.4 SCS therapy discontinuation 3](#_Toc227850337)

[1.5 Adverse events 3](#_Toc227850338)

*Table S2. Adverse events occurring in first 24 months*

*Table S3. Breakdown of adverse events and action taken in Medtronic Product Registry*

[1.6 Device longevity 5](#_Toc227850339)

[1.7 Quality of life 5](#_Toc227850340)

*Table S4. Utility weights by health state*

[1.8 Mortality 6](#_Toc227850341)

[1.9 Unit costs and healthcare resource use 6](#_Toc227850342)

*Table S5. Healthcare resource use, by group*

*Table S6. Unit costs used in model*

[2 Supplementary Analytical Methods 1 13](#_Toc227850343)

[2.1 One-way sensitivity analysis 13](#_Toc227850344)

[2.2 Scenario analysis 13](#_Toc227850345)

[2.3 Probabilistic sensitivity analysis 13](#_Toc227850346)

*Table S7. PSA distributional parameters*

[3 Supplementary Material References 1 17](#_Toc227850347)

# Supplementary Model Inputs 1

## Patient demographics

Model patient demographics included the mean age at baseline (56 years) and the proportion of female patients (53%) in the cohort as gathered during the Kallewaard randomized controlled trial (RCT).1

## Short-term efficacy

Short-term efficacy data for both treatment arms were taken from the Kallewaard RCT and are summarized in Table S1.1 Efficacy data were available for the DTM-SCS arm through 24-months. However, after the optional cross-over designed into the trial, only 5 participants remained in the conventional medical management (CMM) arm beyond 6-months. Therefore, the present study modeled the RCT’s modified intent-to-treat population and assumed that the 6-month efficacy data for the CMM group remained constant throughout the 24-month decision-tree phase.

During the Kallewaard RCT, 94.1% of DTM-SCS patients had a successful trial period, but only 92.2% received an implanted device.1 In the base-case model of the current study, it was assumed that 100% of patients with a successful received a device implant. The actual, lower rate of implantation was used for a scenario analysis.

At the end of the 24-month follow-up period of the Kallewaard RCT,1 88% of DTM-SCS patients had achieved optimal pain relief and 65% had achieved profound relief (defined as > 79% reduction in visual analog score [VAS]). At the 6-month endpoint, 3.6% of CMM patients had achieved optimal pain relief and none had achieved profound pain relief.

**Table S1. Efficacy probabilities used in model, decision tree phase**

| Parameter | Value | Comment(s) |
| --- | --- | --- |
| Test stimulation phase success, DTM-SCS group | 94.1% | Use in base-case analyses |
| Full system implant rate, DTM-SCS group | 92.2% | Used in scenario analysis, Proportion of patients who began the trial stimulation phase who then underwent full system implant |
| Optimal pain relief at 24m, DTM-SCS | 88.4% | Used in base-case analysis. As a % of patients undergoing full system implant |
| Optimal pain relief at 6m, CMM | 3.6% | Used in base-case analysis |
| Profound pain relief at 24m, DTM-SCS * | 60.1% | Used only in scenario analysis |
| Profound pain relief at 6m, CMM | 0.0% | Used only in scenario analysis |

Source: Kallewaard JW, Billet B, Van Paesschen R et al. European randomized controlled trial evaluating differential target multiplexed spinal cord stimulation and conventional medical management in subjects with persistent back pain ineligible for spine surgery: 24-month results. Eur J Pain. 2024;28:1745-1761.

## Long-term efficacy

Consistent with the 2010 NHS model,2 the current model did not allow patients to transition between the optimal and sub-optimal pain relief states beyond the end of the 24-month decision-tree phase. This assumption was applied in both treatment groups.

## SCS therapy discontinuation

Discontinuation from DTM-SCS therapy was modeled as an ongoing risk, with separate data used during the decision-tree and Markov phases. In the Kallewaard RCT,1 15.7% of implanted patients discontinued therapy within the first 24 months. Beyond 24 months, data from a European, retrospective chart review were used to calculate a per-cycle (per 3 months) probability of device explant, which was held constant for the remainder of the model horizon.3 That study reported explants in various ways, and to avoid double counting explants due to battery depletion, which are handled separately in the model, we used a subset of the results which concerned unanticipated explants due to inadequate pain relief as the basis for permanent therapy withdrawals.

The cumulative annual probabilities reported on the Kaplan-Meier curve between years 2 and 5 were converted into 3-month probabilities, and the average 3-month probability was calculated. This resulted in a probability of 0.85% per 3-month cycle, which was applied in all cycles to patients in the DTM-SCS group. After withdrawal, patients were assumed to receive CMM, with equivalent outcomes and costs as those originally receiving CMM alone. Thus, 3.6% of patients who withdrew were assumed to achieve optimal pain relief.

## Adverse events

Adverse events occurring in the first 24 months of the model were based on data from the Kallewaard RCT.1 In that study, 16 out of 51 (29.1%) of the DTM-SCS patients had 28 treatment- or procedure-related adverse events, of which 21 required treatment. Seven of the 21 events were classed as mild by study adjudication, 11 were classified as moderate, and 3 were considered severe (Table S2).

No adverse events were modeled in the CMM group, consistent with the 2010 NHS model,2 and data gathered during the Kallewaard RCT.1

**Table S2. Adverse events occurring in first 24 months***

| Event description | Severity† | Action |
| --- | --- | --- |
| Liquor leakage after revision epidural leads | Mild | Other medical intervention |
| Post-punctional headache | Mild | Other medical intervention |
| Lead and IPG infection | Moderate | Explant and medication |
| Pocket pain | Moderate | Surgery and medication |
| Pocket pain | Moderate | Medication |
| Pocket pain | Mild | Surgery |
| Pain at surgery site | Moderate | Medication |
| Pain at surgery site | Serious | Surgery, explant |
| Surgical site infection | Moderate | Medication |
| Lead migration | Serious | Surgery |
| Increase in back pain | Moderate | Medication |
| Wound pain | Mild | Medication |
| Pocket pain | Mild | Medication |
| Headache | Moderate | Other medical intervention |
| Infection | Mild | Medication |
| Poor wound healing | Severe | Surgery |
| Infection | Moderate | Medication, surgery |
| Wound pain | Moderate | Medication |
| Wound infection | Moderate | Medication, explant |
| Pocket infection | Mild | Medication |
| Pocket infection | Moderate | Surgery |

*Source: Kallewaard JW, Billet B, Van Paesschen R et al. European randomized controlled trial evaluating differential target multiplexed spinal cord stimulation and conventional medical management in subjects with persistent back pain ineligible for spine surgery: 24-month results. Eur J Pain. 2024;28:1745-1761.

†Per the study protocol, severe adverse events were classified as those that either lead to death, were potentially life threatening, risked permanent impairment, required an inpatient hospital stay, or posed risk of fetal death, distress, or injury.

The rate of long-term complications in patients implanted with DTM-SCS was derived from the most recent Medtronic Product Surveillance Registry report,4 which provides event frequencies across several categories (lead migration, lead fracture and device malfunction), as well as the action/treatment required (surgical intervention, re-programming, or no action). The breakdown of these events is shown in Table S3. A 3-month probability of 3.2% was derived from these data and applied to the DTM-SCS treatment group during the Markov phase of the model.

**Table S3. Breakdown of adverse events and action taken in Medtronic Product Registry**

| Event category | Surgical intervention | Re-programming | Therapy suspension | Medical/non-surgical intervention | No action |
| --- | --- | --- | --- | --- | --- |
| Lead migration / dislodgement | 77.2% | 11.7% | 2.5% | 1.9% | 6.7% |
| High impedance | 25.1% | 46.3% | 1.8% | 1.8% | 25.1% |
| Lead fracture | 97.8% | 0.0% | 2.2% | 0.0% | 0.0% |
| Neurostimulator unable to recharge | 35.2% | 4.4% | 3.3% | 50.5% | 6.6% |
| Device malfunction | 20.5% | 7.2% | 3.6% | 60.2% | 8.4% |
| Other | 51.9% | 15.2% | 3.0% | 18.6% | 11.4% |

Source: Medtronic Product Surveillance Report, 2021

## Device longevity

DTM-SCS devices use the IntellisTM platform. A longevity of 9 years was applied such that all patients remaining on therapy would undergo device replacement at 9-year intervals.5 DTM-SCS device warranty conditions (9 years in Belgium) were included in the model. Alternative longevity assumptions were explored in sensitivity analysis.

## Quality of life

A key element of the model is the relationship between pain relief and quality of life. Consistent with the 2010 NHS model,2 utility weights were applied to each health state to reflect varying quality of life (Table S4), with the proportion of patients with optimal and sub-optimal pain relief in each group driving quality-adjusted life-year (QALY) differences over the duration of the model. These utility weights were all based on EQ-5D-5L data collected during the Kallewaard RCT,1 for which Belgian preference weights were applied.

Separate utility weights were applied for the ‘optimal pain relief’ for patients with and without complications. No differentiation was made for the ‘sub-optimal pain relief’ state. Although the base-case model used the probabilities of optimal pain relief as the main efficacy data, the model also included an option to consider ‘profound’ pain relief (> 80% reduction in VAS).

**Table S4. Utility weights by health state**

| Health state | Utility weight | Comment(s) |
| --- | --- | --- |
| Optimal pain relief, no complications | 0.74 |  |
| Optimal pain relief, with complications | 0.69 | Applied for one cycle to patients experiencing an adverse event |
| Sub-optimal pain relief | 0.54 |  |
| No pain relief | 0.40 | Applied for one model cycle at the time of DTM-SCS withdrawal/explantation |
| Profound pain relief- no complications | 0.78 | Only for scenario analysis |
| Profound pain relief- with complications | 0.74 | Only for scenario analysis |
| Suboptimal pain relief (<80%) | 0.64 | Only for scenario analysis |

Source: Kallewaard JW, Billet B, Van Paesschen R et al. European randomized controlled trial evaluating differential target multiplexed spinal cord stimulation and conventional medical management in subjects with persistent back pain ineligible for spine surgery: 24-month results. Eur J Pain. 2024;28:1745-1761.

## Mortality

Patient mortality was modeled based on the Belgian 2023 life expectancy tables,6 matched for the age and gender of the model population. No differential mortality rates were applied according to level of pain relief achieved, and mortality was assumed to be equivalent in both treatment groups.

## Unit costs and healthcare resource use

The model captured a range of costs to reflect different elements of care for patients in each treatment group. The main cost categories were:

- Device acquisition and implantation (both for trial stimulation and full implant)
- Device replacement due to battery depletion
- Adverse event management
- Pain medication
- Non-drug therapy (e.g., nerve blocks, physiotherapy)
- Treatment withdrawal

Unit costs were taken from a range of sources, including the Belgian APR-DRGs and RIZIV honoraria for procedures, hospitalizations, device re-programming, healthcare resource use, and adverse event management,7, 8 and RIZIV list prices for all components of the device kit.9 The model excluded costs associated with repeat spine surgery because PSPS-T1 patients are assumed to be ineligible for surgery.

All patients in the DTM-SCS cohort were assigned the cost of a trial implantation (€ 3152) plus the cost of leads (€ 1090). The cost of the external trial battery was not included individually, as it is a part of the hospital’s lump-sum cost.

For patients proceeding to a full implant, the trial procedure was followed by a second procedure (€ 1462) plus full device kit cost based on the Intellis system. Notably, the clinical authors on this paper advised that, in Belgium, the same leads used for the trial are also used in the permanent implant. Therefore, the costs of leads were only included in the trial implantation in the case of a successful trial.

A separate cost was applied for explantation of the test electrode (€ 1462) in case of inadequate pain relief during the trial implant phase. Device-replacement procedures and DTM-SCS withdrawal procedures were assigned a cost of € 1462 plus the cost of the device. In the first year of the analysis, patients in the DTM-SCS group were assumed to require an average of 2 re-programming visits, which is the maximum number that can be reimbursed per year in Belgium. All re-programming visits were assigned a cost of € 56.

The average per-patient cost of pain medication was calculated based on dose, frequency, and medication types recorded in the Kallewaard RCT,1 using medication prices from the RIZIV database.10 When multiple generic options with different prices existed for a specific medication, the least expensive medication was used. The mean per-patient value was then multiplied by the percentage of patients in each group who used medications during the study to derive the mean drug cost per group at 24-months for DTM-SCS and at 6 months for CMM.

In the Kallewaard RCT, 88.24% of DTM-SCS patients reported medication use, at an average total cost of € 383 over a 24-month period; 87.72% of CMM patients reported medication use, at an average total cost of € 997 over a 6-month period.1 Notably, one patient in the CMM group received treatment with ketamine. The exceedingly high associated medication costs drastically increased the mean drug costs of the CMM group. This patient was left in the sample for the base-case analysis, but a scenario analysis was conducted in which the outlying medication-use data were excluded.

For the long-term Markov phase of the model, drug costs for the DTM-SCS group were assumed to remain the same, whereas drug costs in the CMM group were assumed to decrease by 13.5%, consistent with prior literature.2

Non-drug therapy resource use data were also derived from the Kallewaard RCT (Table S5).1. The categories of healthcare resource use included general-practitioner visits, outpatient visits, inpatient visits, physical rehabilitation, psychological rehabilitation, nurse visits, and spinal injections. The mean number of visits for patients using a given resource was calculated, as well as the percent of patients in the respective group who used that resource.

**Table S5. Healthcare resource use, by group**

| Resource type | CMM % of patients | CMM mean visits per 6 months | DTM-SCS % of patients | DTM-SCS mean visits per 24 months |
| --- | --- | --- | --- | --- |
| Physical rehabilitation | 35.1% | 14.6 | 31.4% | 25.2 |
| General-practitioner visit | 33.3% | 2.5 | 27.5% | 2.3 |
| Outpatient | 31.6% | 3.2 | 25.5% | 2.7 |
| Inpatient | 10.5% | 1.8 | 3.9% | 1.0 |
| Spinal injection | 7.0% | 1.5 | 11.8% | 2.0 |
| Nurse | 1.8% | 2.0 | 9.8% | 13.6 |
| Psychological rehabilitation | 8.8% | 1.8 | 2.0% | 3.0 |

Source: Kallewaard JW, Billet B, Van Paesschen R et al. European randomized controlled trial evaluating differential target multiplexed spinal cord stimulation and conventional medical management in subjects with persistent back pain ineligible for spine surgery: 24-month results. Eur J Pain. 2024;28:1745-1761.

Costs were assigned by applying the healthcare resource use values to the respective RIZIV Honorarium and hospitalization costs, where applicable.8, 11 In total, the cost of non-drug therapy in the initial 24-month cycle in each group was € 2898 (CMM) and € 782 (DTM-SCS). Over the long run, DTM-SCS costs were assumed to remain constant, whereas CMM costs were assumed to decrease by 13.5%, as found in prior literature.2 Notably, there was no way to differentiate whether any given healthcare resource use recorded during the study was for the treatment of an adverse event. Therefore, a conservative assumption was made that all recorded healthcare resource use was in addition the treatments used for adverse events, recognizing that this may have resulted in some double counting for the DTM-SCS group.

The cost of adverse events that occurred in the first 24 months of the Kallewaard RCT,1 and that required intervention or action (n=21) were calculated individually to yield a mean per-event cost of € 1141. After the first 24 months, the DTM-SCS associated adverse event rates described previously were used to calculate an annual per-patient cost of € 118, based on assigning a cost to each combination of event type and action required (Tabe S3).

A full listing of the unit costs used in the model, together with sources and any comments, is shown in Table S6.

**Table S6. Unit costs used in model**

| Cost component | Unit cost | Sources | Code | Assumptions |
| --- | --- | --- | --- | --- |
| Procedures | | | | |
| Trial implant procedure | € 3152 | RIZIV Honorariaa; RIZIV average hospitalization costsb | Procedure (Performed percutaneously without laminotomy): 232492-232503  Anesthesia : 200196 200200  Hospitalization : average price of emergency hospitalization across public and research hospitals in Belgium. | 3-day hospitalization |
| Full implant procedure | € 1023 | RIZIV Honorariaa; RIZIV average hospitalization costsb | Procedure : 354373-354384  Note : Performed percutaneously, with no explant of trial leads.  Anesthesia: 201110 201121  Hospitalization: average price of emergency hospitalization across public and research hospitals in Belgium | 1-day hospitalization |
| Device-replacement procedure (following battery depletion) | € 1023 | RIZIV Honorariaa; RIZIV average hospitalization costsb | Procedure : 354373-354384  Anesthesia: 201110 201121  Hospitalization: average price of emergency hospitalization across public and research hospitals in Belgium | 1-day hospitalization |
| Device explant procedure | € 1023 | RIZIV Honorariaa; RIZIV average hospitalization costsb | Procedure : 354373-354384  Anesthesia: 201110 201121  Hospitalization: average price of emergency hospitalization across public and research hospitals in Belgium | 1-day hospitalization |
| Explant of test electrode (if failed test stimulation) | € 1148 | RIZIV Honorariaa; RIZIV average hospitalization costsb | Procedure: 232411-232422  Anesthesia: 201073 201084  Hospitalization: average price of emergency hospitalization across public and research hospitals in Belgium | 1-day hospitalization |
| Device kit | | | | |
| Temporary lead for trial stimulation | € 1090 | RIZIV list pricec | 171850 - 171861 (neg trial) – Lump sum | Same price as Belgium reimburses for FBSS |
| External battery for trial stimulation | € 0.00 | RIZIV list pricec |  | Same price as Belgium reimburses for FBSS  Battery price included in hospitalization |
| IntellisTM IPG (SCS) | € 17334 | RIZIV list pricec | 151130 - 151141, 151152 - 151163, 151174 - 151185 | Same price as Belgium reimburses for FBSS |
| Lead (cost per lead), SureScan Vectris lead | € 1090 | RIZIV list pricec | 171835 - 171846 – Lump sum | Same price as Belgium reimburses for FBSS |
| Patient recharger | € 1486 | RIZIV list pricec | 151233 - 151244, 151255 - 151266 | Same price as Belgium reimburses for FBSS |
| Patient programmer | € 597 | RIZIV list pricec | 151196 - 151200, 151211 - 151222 | Same price as Belgium reimburses for FBSS |
| Non-drug therapy | | | | |
| Physical rehab | € 56 | RIZIV Honorariaa | 558784 + 105151 |  |
| GP | € 32 | RIZIV Honorariaa | 101076 |  |
| Outpatient | € 33 | RIZIV Honorariaa | weighted average of 105195+105114+105114+102653+105755+105792 |  |
| Inpatient | € 1375 | APR-DRG 23 (mild)d | APR-DRG23 (Spinal procedure- mild) for one day |  |
| Spinal injection | € 950 | RIZIV Honorariaa; RIZIV average hospitalization costsb | weighted average of 202790, 202532, 202521, 202495, 202436 + average cost of day hospitalization  Hospitalization: average price of emergency hospitalization across public and research hospitals in Belgium |  |
| Nurse | € 10 | RIZIV Honorariaa | average of wound care (424336) and complex wound care (424351) |  |
| Psychological rehab | € 87 | RIZIV Honorariaa | 726714 |  |
| Physical rehab | € 56 | RIZIV Honorariaa | 558784 + 105151 |  |
| Total non-drug therapy cost per 3 months - CMM | € 313 | Kallewaard et. al. 2024e; Taylor et. al. 2010f |  | 13.5% reduction after first 24 months |
| Total non-drug therapy cost per 3 months, DTM-SCS | € 98 | Kallewaard et. al. 2024e |  |  |
| Device re-programming | | | | |
| Cost per re-programming visit | € 56 | RIZIV Honorariaa | 232433 + 105195  Note Code 105195 is Consultation with the preparation of a written report of a specialized assessment for pain related to spinal pathology |  |
| Drug therapy | | | | |
| 24m- CMM | € 3497 | Kallewaard et. al. 2024e; RIZIV Drug Tariffsg |  |  |
| 24m– DTM-SCS | € 338 | Kallewaard et. al. 2024e; RIZIV Drug Tariffsg |  |  |
| Post-24m, CMM (per 3 months) | € 378 | Kallewaard et. al. 2024e; RIZIV Drug Tariffsg; Taylor et.al. 2010f |  | 13.5% reduction after first 24 months |
| Post-24m, DTM-SCS (per 3 months) | € 42 | Kallewaard et. al. 2024e; RIZIV Drug Tariffsg |  |  |
| Adverse events | | | | |
| Cost per DTM-SCS adverse event (24 months) | € 1144 | Kallewaard et. al. 2024e; RIZIV Honorariaa |  |  |
| Cost per year of adverse events (beyond 24 months), DTM-SCS patients | € 929 | Medtronic Product Surveillance Registry report (2020)h; RIZIV Honorariaa |  | Applied to all patients receiving DTM-SCS, based on an assumed incidence of 0.127 events per patient, per year. |

Sources: a National Institute for Sickness and Disability Insurance (Belgium). [Nomenclature - Texts]. Updated 30 Jan 2025. <https://www.riziv.fgov.be/nl/nomenclatuur/nomenclatuur-teksten>; b National Institute for Sickness and Disability Insurance (Belgium). [Hospital nursing day rates]. Updated Accessed <https://www.riziv.fgov.be/nl/thema-s/verzorging-kosten-en-terugbetaling/wat-het-ziekenfonds-terugbetaalt/verzorging-in-ziekenhuizen/verpleegdagprijzen-ziekenhuizen>; c National Institute for Sickness and Disability Insurance (Belgium). [Implants and invasive medical devices: List of supplies and nominative lists of individual devices]. Updated Accessed <https://www.riziv.fgov.be/nl/professionals/individuele-zorgverleners/verstrekkers-van-implantaten/implantaten-en-invasieve-medische-hulpmiddelen-lijst-van-de-verstrekkingen-en-nominatieve-lijsten-van-de-individuele-hulpmiddelen>; d eTCT. [Financiële feedback per pathologie]. <https://tct.fgov.be/webetct/etct-web/national_data?lang=nl>; e Kallewaard JW, Billet B, Van Paesschen R et al. European randomized controlled trial evaluating differential target multiplexed spinal cord stimulation and conventional medical management in subjects with persistent back pain ineligible for spine surgery: 24-month results. Eur J Pain. 2024;28:1745-1761; f Taylor RS, Ryan J, O’Donnell R, Eldabe S, Kumar K, North RB. The cost-effectiveness of spinal cord stimulation in the treatment of failed back surgery syndrome. Clin J Pain. 2010;26:463-469; g National Institute for Sickness and Disability Insurance (Belgium). [Reimbursable medicines and radiopharmaceutical products]. Updated 5 Jul 2025. Accessed <https://webappsa.riziv-inami.fgov.be/ssp/ProductSearch>; h Medtronic Plc. Product Performance Report. Summary of data from the Medtronic post-market registry, 2020.

# Supplementary Analytical Methods 1

## One-way sensitivity analysis

One-way sensitivity analysis was undertaken by varying input parameter values, one at a time, to explore the impact of individual parameter variability on the cost-effectiveness results. Wherever possible, the confidence interval for each parameter value was used as the basis for the lower and upper values (in other cases, 20% variation either side of the mean was used as the basis for the range of values explored). To avoid generating incremental cost effectiveness ratios (ICERs) with a negative value, the results were presented in terms of the incremental net benefit (INB) of the treatment versus the comparator. The INB was calculated as follows for each treatment comparison:

where,

λ = willingness-to-pay threshold of € 30,000 per QALY gained

Qδ = incremental QALYs for the current treatment comparison

Cδ = incremental costs for the current treatment comparison.

A positive INB indicated that the treatment was cost-effective versus the comparator at the specified willingness-to-pay threshold, whereas a negative INB indicated it was not cost-effective. The results of the one-way sensitivity analysis for each treatment comparison were presented as tornado diagrams.

## Scenario analysis

Three scenario analyses were undertaken to test specific assumptions within the model:

1. Using the actual rate of SCS implantation from the Kallewaard RCT (92.2%) instead of the measured trial stimulation success (response) rate of 94.1%, which was used in the base-case analysis.
2. Changing the definition of ‘optimal pain relief’ among patients undergoing full device implantation to be a >80% improvement in pain score (versus baseline), rather than the 50% threshold used in the base-case analysis. Again, using data from the Kallewaard RCT,2 this equates to a response rate of 60.5% in the DTM-SCS group (instead of 88.4% in the base-case).
3. Excluding data from a single patient in the CMM group who had exceedingly high medication costs due to ketamine treatment.

## Probabilistic sensitivity analysis

Finally, a probabilistic sensitivity analysis was undertaken to explore the joint effect of uncertainty in all model parameters upon the results. A statistical distribution was assigned to each parameter using confidence intervals and with the choice of distribution being appropriate to the parameter type (Table S7). Thus, beta distributions were used for probability and utility weight parameters to constrain the sampled values between 0 and 1, gamma distributions for cost parameters to ensure a non-negative sampled value, and normal distributions used for other parameters, such as patient age. This analysis consisted of sampling 10,000 sets of model inputs from these distributions, with the costs and QALYs of each treatment re-calculated each time. Results were presented as scatter plots and cost-effectiveness acceptability curves.

**Table S7. PSA distributional parameters**

| Parameter | Mean | Alpha/param 1 | Beta/ param 2 | Distribution |
| --- | --- | --- | --- | --- |
| Demographics | | | | |
| Patient age | 56.4 | 56.4 | 1.24 | Normal |
| % female | 53% | 57 | 51 | Beta |
| Disease inputs | | | | |
| Trial phase success rate | 94.1% | 48 | 3 | Beta |
| Proportion implanted | 92.2% | 47 | 4 | Beta |
| Optimal pain relief 24m- DTM-SCS | 88.4% | 38 | 5 | Beta |
| Optimal pain relief 24m- CMM | 3.6% | 2 | 54 | Beta |
| Profound pain relief 24m- DTM-SCS | 60.5% | 26 | 7 | Beta |
| Probability of discontinuing DTM-SCS- 24m | 15.7% | 8 | 43 | Beta |
| Probability of discontinuing DTM-SCS- beyond 24m | 0.85% | 10.6 | 1236.85 | Beta |
| DTM-SCS complication rate | 29.1% | 16 | 35 | Beta |
| Healthcare resource use inputs | | | | |
| % CMM patients (6 mo): physical rehab | 35.1% | 20 | 37 | Beta |
| % CMM patients (6 mo): GP | 33.3% | 19 | 38 | Beta |
| % CMM patients (6 mo): Outpatient | 31.6% | 18 | 39 | Beta |
| % CMM patients (6 mo): inpatient | 10.5% | 6 | 51 | Beta |
| % CMM patients (6 mo): spine injections | 7.0% | 4 | 53 | Beta |
| % CMM patients (6 mo): nurse | 1.8% | 1 | 56 | Beta |
| % CMM patients (6 mo): Psych rehab | 8.8% | 5 | 52 | Beta |
| % DTM-SCS patients (24 mo): physical rehab | 31.4% | 16 | 35 | Beta |
| % DTM-SCS patients (24 mo): GP | 27.5% | 14 | 37 | Beta |
| % DTM-SCS patients (24 mo): Outpatient | 25.5% | 13 | 38 | Beta |
| % DTM-SCS patients (24 mo): inpatient | 3.9% | 2 | 49 | Beta |
| % DTM-SCS patients (24 mo): spine injections | 11.8% | 6 | 45 | Beta |
| % DTM-SCS patients (24 mo): nurse | 9.8% | 5 | 46 | Beta |
| % DTM-SCS patients (24 mo): Psych rehab | 2.0% | 1 | 50 | Beta |
| Mean visits CMM (6mo): physical rehab | 14.6 | 18.3 | 0.80 | Gamma |
| Mean visits CMM (6 mo): GP | 2.5 | 23.1 | 0.11 | Gamma |
| Mean visits CMM (6 mo): Outpatient | 3.2 | 22.9 | 0.14 | Gamma |
| Mean visits CMM (6 mo): inpatient | 1.8 | 14.8 | 0.12 | Gamma |
| Mean visits CMM (6 mo): spine injections | 1.5 | 27.0 | 0.06 | Gamma |
| Mean visits CMM (6 mo): nurse | 2 | 0 | 0 | Gamma |
| Mean visits CMM (6 mo): Psych rehab | 1.8 | 9.5 | 0.19 | Gamma |
| Mean visits DTM-SCS (24 mo): physical rehab | 25.2 | 31.2 | 0.81 | Gamma |
| Mean visits DTM-SCS (24 mo): GP | 2.3 | 12.1 | 0.19 | Gamma |
| Mean visits DTM-SCS (24 mo): Outpatient | 2.7 | 40.8 | 0.01 | Gamma |
| Mean visits DTM-SCS (24 mo): inpatient | 1 | 0 | 0.01 | Gamma |
| Mean visits DTM-SCS (24 mo): spine injections | 2 | 8.6 | 0.01 | Gamma |
| Mean visits DTM-SCS (24 mo): nurse | 13.6 | 55.1 | 0.01 | Gamma |
| Mean visits DTM-SCS (24 mo): Psych rehab | 3 | 0 | 0.01 | Gamma |
| Cost inputs | | | | |
| Trial implant procedure | € 3,152 | € 96 | € 33 | Gamma |
| Full implant procedure | € 1,462 | € 96 | € 15 | Gamma |
| Device-replacement procedure (device-only) | € 1,462 | € 96 | € 15 | Gamma |
| Device explant procedure | € 1,462 | € 96 | € 15 | Gamma |
| Explant of test electrode (if failed test stimulation) | € 1,148 | € 96 | € 12 | Gamma |
| Trial leads/extensions | € 1,090 | € 96 | € 11 | Gamma |
| Intellis IPG (DTM-SCS) | € 17,334 |  |  | Gamma |
| Leads/extensions | € 1,090 | € 96 | € 180 | Gamma |
| Patient recharger | € 1,486 | € 96 | € 11 | Gamma |
| Patient programmer | € 597 | € 96 | € 15 | Gamma |
| Physical rehab | € 56 | € 96 | € 1 | Gamma |
| GP | € 32 | € 96 | € 0 | Gamma |
| Outpatient | € 33 | € 96 | € 0 | Gamma |
| Inpatient | € 1,375 | € 96 | € 14 | Gamma |
| Spinal injection | € 950 | € 96 | € 10 | Gamma |
| nurse | € 10 | € 96 | € 0 | Gamma |
| Psychological rehab | € 87 | € 96 | € 1 | Gamma |
| Cost per device re-programming visit | € 56 | € 96 | € 1 | Gamma |
| % reduction in CMM costs post 24 months (CMM only) | € 0 | € 332 | € 2,128 | Beta |
| Mean drug cost CMM (6 mo) | € 997 | € 2 | € 421 | Gamma |
| Mean drug cost DTM-SCS (24 mo) | € 383 | € 16 | € 24 | Gamma |
| % drug use CMM | 87.7% | 50 | 7 | Beta |
| % drug use DTM-SCS | 88.2% | 45 | 6 | Beta |
| Utility inputs | | | | |
| Optimal/profound pain relief without complication | 0.74 | 4.6 | 1.6 | Beta |
| Optimal/profound pain relief with complication | 0.69 | 2.5 | 1.1 | Beta |
| Sub-optimal pain relief | 0.54 | 4.0 | 3.4 | Beta |
| No pain relief | 0.40 | 1.4 | 2.1 | Beta |
| Profound pain relief without complications | 0.78 | 4.0 | 1.1 | Beta |
| Profound pain relief with complications | 0.74 | 1.9 | 0.67 | Beta |
| Sub-optimal profound | 0.63 | 4.1 | 2.4 | Beta |

# Supplementary Material References 1

1. Kallewaard JW, Billet B, Van Paesschen R et al. European randomized controlled trial evaluating differential target multiplexed spinal cord stimulation and conventional medical management in subjects with persistent back pain ineligible for spine surgery: 24-month results. Eur J Pain. 2024;28(10):1745-1761.

2. Taylor RS, Ryan J, O’Donnell R, Eldabe S, Kumar K, North RB. The cost-effectiveness of spinal cord stimulation in the treatment of failed back surgery syndrome. Clin J Pain. 2010;26(6):463-469.

3. Van Buyten JP, Wille F, Smet I et al. Therapy-related explants after spinal cord stimulation: Results of an international retrospective chart review study. Neuromodulation. 2017;20(7):642-649.

4. Medtronic Plc. Product Performance Report. Summary of data from the Medtronic post-market registry. 2020

5. Medtronic Plc. Data on File. 2022

6. [Life expectancy and life tables: Evolution of life expectancy at birth in years, Belgium (1996-2023)]. STATBEL. Available from: https://statbel.fgov.be/en/themes/population/mortality-life-expectancy-and-causes-death/life-expectancy-and-life-tables#panel-12. Accessed 28 Apr 2025.

7. Financiële feedback per pathologie. eTCT. Available from: https://tct.fgov.be/webetct/etct-web/national_data?lang=nl. Accessed 28 Apr 2025.

8. [Nomenclature - Texts]. National Institute for Sickness and Disability Insurance (Belgium). Available from: https://www.riziv.fgov.be/nl/nomenclatuur/nomenclatuur-teksten. Accessed 30 Jan 2025.

9. [Implants and invasive medical devices: List of supplies and nominative lists of individual devices]. National Institute for Sickness and Disability Insurance (Belgium). Available from: https://www.riziv.fgov.be/nl/professionals/individuele-zorgverleners/verstrekkers-van-implantaten/implantaten-en-invasieve-medische-hulpmiddelen-lijst-van-de-verstrekkingen-en-nominatieve-lijsten-van-de-individuele-hulpmiddelen. Accessed 4 Nov 2024.

10. [Reimbursable medicines and radiopharmaceutical products]. National Institute for Sickness and Disability Insurance (Belgium). Available from: https://webappsa.riziv-inami.fgov.be/ssp/ProductSearch. Accessed 5 Jul 2025.

11. [Hospital nursing day rates]. National Institute for Sickness and Disability Insurance (Belgium). Available from: https://www.riziv.fgov.be/nl/thema-s/verzorging-kosten-en-terugbetaling/wat-het-ziekenfonds-terugbetaalt/verzorging-in-ziekenhuizen/verpleegdagprijzen-ziekenhuizen. Accessed 28 Apr 2025.
